# Supplementary material for: Structure, phylogeny, and expression of the frizzled-related gene family in the lophotrochozoan annelid Platynereis dumerilii
Source: PubMed Central journal article supplement (PMC4669655; doi:10.1186/s13227-015-0032-4), 2015-12-04
Supplement: 13227_2015_32_MOESM1_ESM.pdf [file 13227_2015_32_MOESM1_ESM.pdf]

**Frizzled proteins** **Accession number/ref. genome**

**Frizzled 1/2/7**

|                     |              |
|---------------------|--------------|
| Ac_Fz1/2/7          | XP_005103676 |
| *Bf_Fz1/2/7         | XP_002605403 |
| *Ce_Fz1/2/7 (MOM-5) | NP_492635    |
| Cg_Fz1/2/7          | XP_011422642 |
| Ct_Fz1/2/7          | ELT94235     |
| *Dm_Fz1/2/7 (Fz)    | NP_001261836 |
| Dp_Fz1/2/7          | EFX86266     |
| Dr_Fz1              | NP_001124086 |
| Dr_Fz2              | NP_571215    |
| Dr_Fz7a             | AAH56280     |
| Dr_Fz7b             | AAH49397     |
| Hr_Fz1/2/7a         | XP_009009899 |
| Hr_Fz1/2/7b         | XP_009014585 |
| Hs_Fz1              | NP_003496    |
| Hs_Fz2              | NP_001457    |
| Hs_Fz7              | NP_003498    |
| Lg_Fz1/2/7          | XP_009047666 |
| Nv_Fz1/2/7          | XP_001647540 |
| Sk_Fz1/2/7          | XP_006820151 |
| *Sp_Fz1/2/7         | XP_003724561 |
| Tc_Fz1/2/7          | NP_001164247 |
| Xl_Fz1              | NP_001079207 |
| Xl_Fz2              | NP_001083829 |
| Xl_Fz7              | CAB45875     |

**Frizzled 4**

|                 |              |
|-----------------|--------------|
| Ac_Fz4          | XP_005112462 |
| *Bf_Fz4         | XP_002612241 |
| *Ce_MIG-1 (Fz4) | NP_490796    |
| Cg_Fz4          | EKC19233     |
| Ct_Fz4          | ELU03627     |
| *Dm_Fz4         | AAF81195     |
| *Dp_Fz4         | EFX79362     |
| Dr_Fz4          | NP_001292398 |
| Hs_Fz4          | NP_036325    |
| Lg_Fz4          | XP_009050162 |
| Nv_Fz4          | XP_001622965 |
| Sk_Fz4          | XP_002730495 |
| *Sp_Fz4         | XP_011682220 |
| Tc_Fz4          | XP_967603    |
| Xl_Fz4          | NP_001083922 |

**Frizzled 5/8**

|                   |                              |
|-------------------|------------------------------|
| Ac_Fz5/8          | XP_005093188                 |
| *Bf_Fz5/8         | estExt_fgenesh2_pg.C.1280051 |
| *Ce_Fz5/8 (CFZ-2) | NP_503965                    |
| Cg_Fz5/8          | XP_011451646                 |
| Ct_Fz5/8          | ELT92800                     |
| *Dm_Fz5/8 (Fz2)   | AAC47273                     |
| Dp_Fz5/8          | EFX87639                     |
| Dr_Fz5            | NP_571209                    |
| Dr_Fz8a           | NP_570993                    |
| Dr_Fz8b           | NP_571628                    |
| Hs_Fz5            | NP_003459                    |
| Hs_Fz8            | NP_114072                    |
| Lg_Fz5/8          | XP_009048933                 |
| Nv_Fz5/8          | XP_001634995                 |
| Sk_Fz5/8          | NP_001161547                 |
| *Sp_Fz5/8         | XP_003724546                 |
| Tc_Fz5/8          | XP_968118                    |
| Xl_Fz5            | NP_001079217                 |
| Xl_Fz8            | AAI69949                     |

**Frizzled 9/10**

|                     |              |
|---------------------|--------------|
| Ac_Fz9/10           | XP_005100653 |
| *Bf_Fz9/10          | XP_002599055 |
| *Ce_Fz9/10 (LIN-17) | NP_001021813 |
| Cg_Fz9/10           | XP_011456333 |
| Ct_Fz9/10           | ELU07504     |

**Frizzled proteins**

**Accession number/ref. genome**

|                  |                        |
|------------------|------------------------|
| *Dm_Fz9/10 (Fz3) | BAA84677               |
| Dr_Fz9a          | CAQ14916               |
| Dr_Fz9b          | XP_003198734           |
| Dr_Fz10          | CAD10102               |
| Hr_Fz9/10        | XP_009027738           |
| Hr_Fz9/10b       | XP_009028364           |
| Hs_Fz9           | AAH26333               |
| Hs_Fz10          | AAH70037               |
| Lg_Fz9/10        | XP_009060024           |
| Nv_Fz9/10        | XP_001630630           |
| Sk_Fz9/10        | XM_006817125 from mRNA |
| *Sp_Fz9/10       | XP_011664398           |
| Xl_Fz10a         | AAI69887               |
| Xl_Fz10b         | AAH72128               |

**sFRP 1/2/5**

|                        |                        |
|------------------------|------------------------|
| Ac_sFRP1/2/5           | NP_001191650           |
| *Bf_sFRP1/2/5a         | XP_002608045           |
| *Bf_sFRP1/2/5b         | XP_002611318           |
| *Ce_sFRP-1 (sFRP1/2/5) | NP_500977              |
| Cg_sFRP1/2/5           | XP_011456955           |
| Ct_sFRP1/2/5           | e.gw1.111.17.1         |
| Dp_sFRP1/2/5           | EFX90356               |
| Dr_sFRP1a              | AAI08048               |
| Dr_sFRP1b              | NP_001077040           |
| Dr_sFRP2               | AAI24708               |
| Dr_sFRP2L              | XM_003200104 from mRNA |
| Dr_sFRP5               | NP_571933              |
| *Dr_Szl                | AAH94990               |
| Hr_sFRP1/2/5a          | XP_009023421           |
| Hr_sFRP1/2/5b          | XP_009028340           |
| Hs_sFRP1               | NP_003003              |
| Hs_sFRP2               | NP_003004              |
| Hs_sFRP5               | AAD25052               |
| Lg_sFRP1/2/5           | XP_009051836           |
| Nv_sFRP1/2/5           | XP_001638620           |
| Sk_sFRP1/2/5           | NP_001161656           |
| *Sp_sFRP1/2/5          | XP_781087              |
| *Xl_Crescent           | NP_001082025           |
| Xl_sFRP1               | NP_001080957           |
| Xl_sFRP2               | NP_001080663           |
| Xl_sFRP5               | NP_001083946           |
| *Xl_Szl                | NP_001081990           |

**sFRP 3/4**

|             |              |
|-------------|--------------|
| Ac_sFRP3/4  | XP_005110283 |
| Bf_sFRP3/4  | XP_002612882 |
| Cg_sFRP3/4  | EKC37416     |
| Dp_sFRP3/4  | EFX72724     |
| Dr_sFRP3/4  | AJG06035     |
| Hs_sFRP3    | AAC50736     |
| Hs_sFRP4    | CAG46532     |
| Nv_sFRP3/4  | XP_001638660 |
| Sk_sFRP3/4  | XP_006825063 |
| *Sp_sFRP3/4 | XP_011667363 |
| Xl_sFRP3/4  | AAC60113     |

**Smoothened**

|         |              |
|---------|--------------|
| Ac_Smo  | XP_005106761 |
| Cg_Smo  | XP_011413301 |
| Ct_Smo  | ELT97156     |
| *Dm_Smo | NP_523443    |
| Dp_Smo  | EFX80809     |
| Dr_Smo  | AAK83380     |
| Hr_Smo  | XP_009031206 |
| Hs_Smo  | NP_005622    |
| Lg_Smo  | XP_009064048 |
| Nv_Smo  | XP_001632182 |
| Sk_Smo  | XP_006817784 |
| Tc_Smo  | NP_001127850 |
| Xl_Smo  | NP_001082084 |
