# Supplementary material for: Structure, phylogeny, and expression of the frizzled-related gene family in the lophotrochozoan annelid Platynereis dumerilii
Source: PubMed Central journal article supplement (PMC4669655; doi:10.1186/s13227-015-0032-4), 2015-12-04
Supplement: 13227_2015_32_MOESM2_ESM.pdf [file 13227_2015_32_MOESM2_ESM.pdf]

**Netrin domain proteins****sFRP1/2/5**

|              |                        |
|--------------|------------------------|
| Bf_sFRP1/2/5 | XP_002608045           |
| Cg_sFRP1/2/5 | XP_011456955           |
| Ct_sFRP1/2/5 | e_gw1.111.17.1         |
| Dr_sFRP1a    | AAI08048               |
| Dr_sFRP1b    | NP_001077040           |
| Dr_sFRP2     | AAI24708               |
| Dr_sFRP2L    | XM_003200104 from mRNA |
| Dr_sFRP5     | NP_571933              |
| Dr_Sz        | AAH94990               |
| Dr_TLC       | NP_938176              |
| Gg_Cre       | NP_990430              |
| Hs_sFRP1     | NP_003003              |
| Hs_sFRP2     | NP_003004              |
| Hs_sFRP5     | AAD25052               |
| Nv_sFRP1/2/5 | XP_001638620           |
| Sk_sFRP1/2/5 | NP_001161656           |
| Sp_sFRP1/2/5 | XP_781087              |
| Xl_Cre       | NP_001082025           |
| Xl_sFRP1     | NP_001080957           |
| Xl_sFRP2     | NP_001080663           |
| Xl_sFRP5     | NP_001083946           |
| Xl_Sz        | NP_001081990           |

**sFRP3/4**

|            |              |
|------------|--------------|
| Bf_sFRP3/4 | XP_002612882 |
| Cg_sFRP3/4 | EKC37416     |
| Dr_sFRP3/4 | AJG06035     |
| Hs_sFRP3   | AAC50736     |
| Hs_sFRP4   | CAG46532     |
| Nv_sFRP3/4 | XP_001638660 |
| Xl_sFRP3/4 | AAC60113     |

**Accession numbers****Netrin domain proteins****Other NTR domain proteins**

|             |              |
|-------------|--------------|
| Bf_ADAMTSL5 | XP_002586752 |
| Bf_C3       | XP_002612866 |
| Bf_TIMP2    | AEU03843     |
| Bf_WFIKKN   | XP_002607180 |
| Cg_C3       | EKC24393     |
| Cg_Ntr3     | EKC26179     |
| Cg_TIMP2    | NP_001292265 |
| Cg_TIMP3    | NP_001292268 |
| Dp_Ntr      | EFX75164     |
| Dr_C3A      | NP_571317    |
| Dr_C4       | XP_001334640 |
| Dr_Ntr1a    | NP_571104    |
| Dr_Ntr3     | NP_001032492 |
| Dr_Ntr4     | AAI63582     |
| Dr_PCOLCE   | NP_001122259 |
| Dr_PCOLCE1a | NP_001025352 |
| Dr_PCOLCE2  | XP_009295891 |
| Dr_TIMP2    | NP_878294    |
| Dr_WFIKKN   | AAH68412     |
| Hs_C3       | NP_000055    |
| Hs_C4A      | NP_001239133 |
| Hs_C5       | NP_001726    |
| Hs_Ntr1     | AAD09221     |
| Hs_Ntr3     | NP_006172    |
| Hs_Ntr4     | NP_067052    |
| Hs_Ntr5     | NP_665806    |
| Hs_PCOLCE   | EAL23825     |
| Hs_PCOLCE1  | EAL23825     |
| Hs_PCOLCE2  | NP_037495    |
| Hs_TIMP1    | EAW59316     |
| Hs_TIMP2    | EAW89539     |
| Hs_WFIKKN1  | NP_444514    |
| Mm_ADAMTSL5 | EDL31560     |
| Mm_WFIKKN1  | AAH26460     |
| Nv_C3a      | BAH22725     |
| Nv_C3b      | BAH22723     |
| Nv_Ntr1     | XP_001628899 |
| Nv_TIMP     | XP_001625448 |
| Nv_TIMP2    | XP_001625449 |
| Pd_Ntr1     | ABO93214     |
| Sk_C3       | XP_006823058 |
| Sk_Ntr1     | NP_001158400 |
| Sk_Ntr4     | NP_001164710 |
| SkWFIKKN1   | XP_002732704 |
| Sp_C3       | NP_999686    |
| Sp_Ntr1     | XP_011669599 |
| Sp_TIMP     | XP_780837    |
| Sp_WFIKKN   | XP_011672335 |
| Xl_C3       | 2116268A     |
| Xl_C4       | AAI70422     |
| Xl_Ntr1     | AAB87983     |
| Xl_PCOLCE   | NP_001087777 |
| Xl_PCOLCE2  | NP_001080499 |
| Xl_TIMP2    | NP_001087748 |

**Accession numbers**

**Additional File 3**
