# Supplementary material for: Structure, phylogeny, and expression of the frizzled-related gene family in the lophotrochozoan annelid Platynereis dumerilii
Source: PubMed Central journal article supplement (PMC4669655; doi:10.1186/s13227-015-0032-4), 2015-12-04
Supplement: 13227_2015_32_MOESM4_ESM.pdf [file 13227_2015_32_MOESM4_ESM.pdf]

| Gene      | 2hpf  | 4hpf | 6hpf | 8hpf | 10hpf | 12hpf | 14hpf |
|-----------|-------|------|------|------|-------|-------|-------|
| Fz1/2/7   | 103.5 | 20.0 | 17.5 | 12.1 | 53.6  | 57.2  | 18.5  |
|           | 85.4  | 17.1 | 16.2 | 9.0  | 53.4  | 38.9  | 12.7  |
| Fz4       | 0.1   | 0.1  | 0.3  | 0.3  | 0.5   | 0.2   | 0.4   |
|           | 0.1   | 0.1  | 0.2  | 0.2  | 0.4   | 0.2   | 0.3   |
| Fz5/8     | 0.0   | 3.3  | 8.9  | 4.5  | 13.0  | 14.2  | 5.3   |
|           | 0.0   | 0.1  | 6.8  | 3.5  | 10.8  | 11.5  | 3.6   |
| Fz9/10    | 1.7   | 1.0  | 4.6  | 8.7  | 8.2   | 4.1   | 7.5   |
|           | 0.3   | 0.5  | 2.1  | 6.0  | 4.9   | 4.1   | 5.5   |
| sFRP1/2/5 | 0.0   | 0.0  | 1.4  | 16.8 | 17.5  | 8.9   | 8.5   |
|           | 0.0   | 0.0  | 0.4  | 13.2 | 13.3  | 7.0   | 8.3   |
| sFRP3/4   | 0.1   | 0.1  | 0.3  | 0.2  | 0.2   | 0.1   | 0.0   |
|           | 0.1   | 0.0  | 0.1  | 0.2  | 0.1   | 0.1   | 0.0   |
| FzCRD-1   | 0.4   | 0.7  | 0.6  | 1.0  | 9.6   | 17.8  | 17.1  |
|           | 0.2   | 0.7  | 0.6  | 0.2  | 6.4   | 13.2  | 16.9  |
| FzCRD-2   | 0.1   | 0.0  | 0.0  | 0.0  | 0.0   | 0.1   | 0.2   |
|           | 0.0   | 0.0  | 0.0  | 0.0  | 0.0   | 0.0   | 0.0   |
| FzCRD-3   | 0.1   | 0.0  | 0.0  | 0.1  | 0.0   | 0.1   | 0.0   |
|           | 0.0   | 0.0  | 0.0  | 0.0  | 0.0   | 0.0   | 0.0   |

## Additional File 4
