# Supplementary material for: Structure, phylogeny, and expression of the frizzled-related gene family in the lophotrochozoan annelid Platynereis dumerilii
Source: PubMed Central journal article supplement (PMC4669655; doi:10.1186/s13227-015-0032-4), 2015-12-04

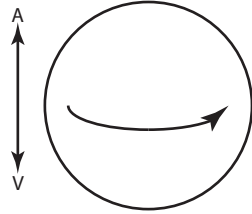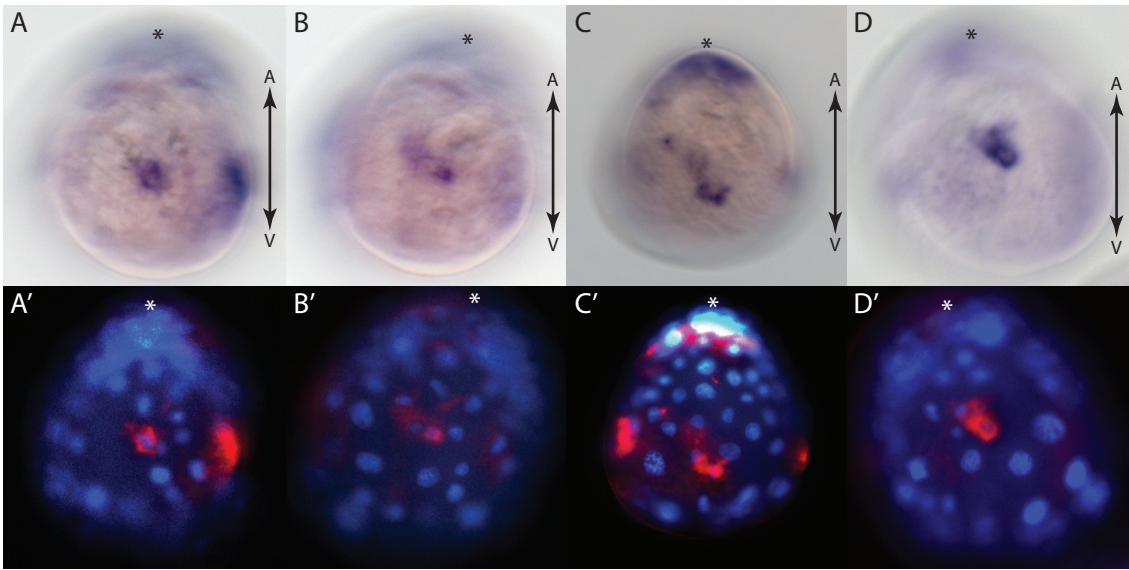

Supplement: 13227_2015_32_MOESM5_ESM.pdf [file 13227_2015_32_MOESM5_ESM.pdf]
